# Supplementary material for: Effects of a Behavioral Weight Loss Intervention and Metformin Treatment on Serum Urate: Results from a Randomized Clinical Trial
Source: MDPI journal article supplement (doi:10.3390/nu13082673), 2021-07-31
Supplement: s1 [file s1]

## Supporting Figures

**Figure S1:** Kernel density plots depicting (A) the probability density of serum urate level with time at baseline, 3 months, 6 months, and 12 months, (B) the probability density of all three follow-up visit serum urate levels by intervention arm, namely self-directed weight loss, coach-directed weight loss, and metformin, and (C) the probability density of change in serum urate level from baseline (BI) by intervention arm.

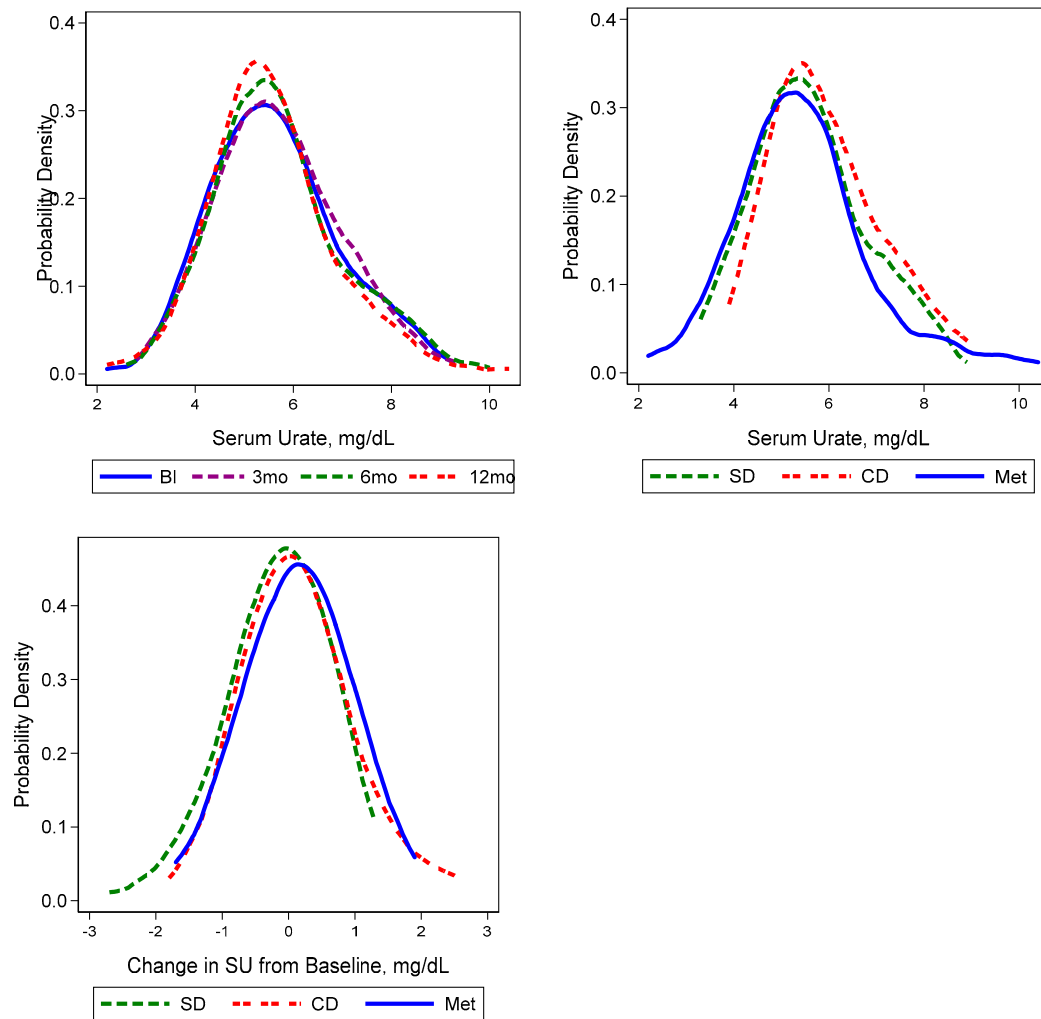

**Figure S2:** (A) Cross-sectional relationship between change in serum urate (SU) and body mass index (BMI) from baseline, pooled across all study visits, using a Lowess smoother. (B) Cross-sectional relationship between change in SU and estimated glomerular filtration rate (eGFR) from baseline, pooled across all study visits, using a Lowess smoother (Both). The x-axis depicts the either change in BMI from baseline, in  $\text{kg/m}^2$ , or change in eGFR from baseline, in  $\text{ml/min/1.73 m}^2$ . The y-axis depicts the change in SU from baseline, in  $\text{mg/dL}$ . Each open circle in the scatter plot denotes one patient follow-up visit. The red horizontal line represents no change. The blue line reflects the slope of a simple linear regression (Beta). The dashed black line is a model fit with a Lowess smoother.

(A)

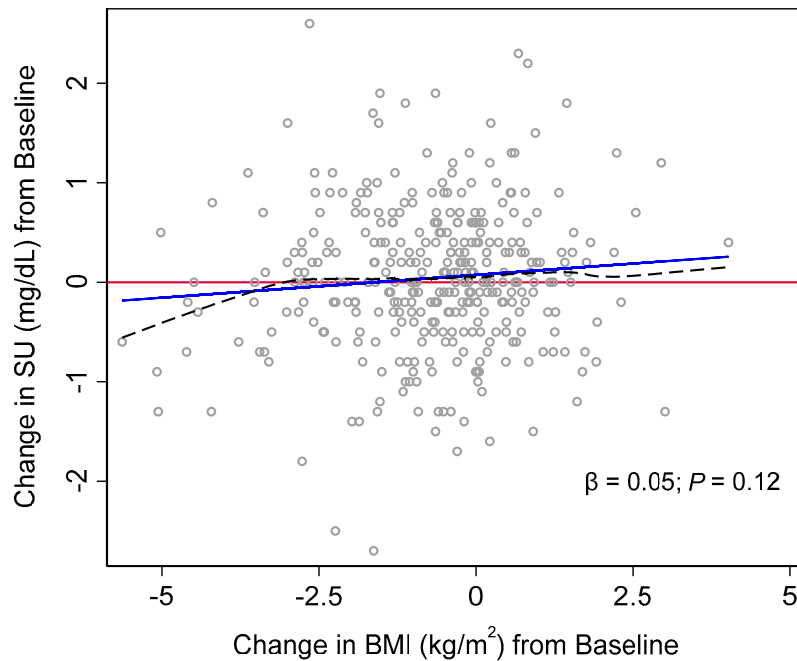

(B)

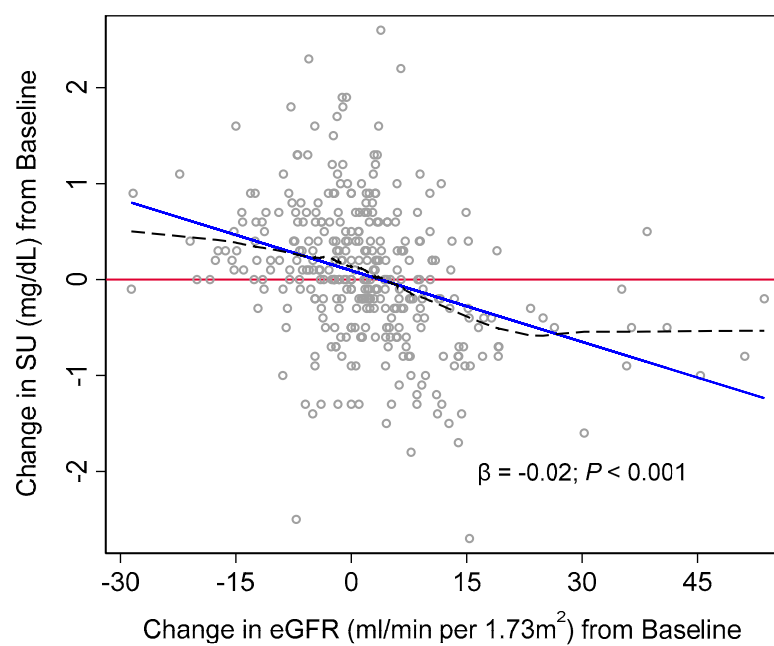

## Supporting Tables

**Table S1.** Inclusion and exclusion criteria for the SPIRIT trial

| Inclusion Criteria                                                                                                                                                                                                                                                                                                                                                                                                                                                                                                                                                                                                                                                                                                                                                                                                                                                                                                                                                                                                         | Exclusion Criteria                                                                                                                                                                                                                                                                                                                                                                                                                                                                                                                                                                                                                                                                                                                                                                                                                                                                                                                                                                                                                                                                                                                                                                                                                                                                                                                                                                                                                               |
|----------------------------------------------------------------------------------------------------------------------------------------------------------------------------------------------------------------------------------------------------------------------------------------------------------------------------------------------------------------------------------------------------------------------------------------------------------------------------------------------------------------------------------------------------------------------------------------------------------------------------------------------------------------------------------------------------------------------------------------------------------------------------------------------------------------------------------------------------------------------------------------------------------------------------------------------------------------------------------------------------------------------------|--------------------------------------------------------------------------------------------------------------------------------------------------------------------------------------------------------------------------------------------------------------------------------------------------------------------------------------------------------------------------------------------------------------------------------------------------------------------------------------------------------------------------------------------------------------------------------------------------------------------------------------------------------------------------------------------------------------------------------------------------------------------------------------------------------------------------------------------------------------------------------------------------------------------------------------------------------------------------------------------------------------------------------------------------------------------------------------------------------------------------------------------------------------------------------------------------------------------------------------------------------------------------------------------------------------------------------------------------------------------------------------------------------------------------------------------------|
| <ul style="list-style-type: none"> <li>• Women and men ages 18 or older</li> <li>• Have been previously diagnosed with a malignant solid tumor, completed their required surgical, and/or chemotherapy and/or radiation curative intent therapy at least three months prior to enrollment, and have an anticipated treatment-free life span of 12 months or longer. Chemoprophylaxis with tamoxifen or aromatase inhibitors for breast cancer in women and anti-LHRH therapy for prostate cancer in men will be permitted.</li> <li>• Have a BMI of 25 kg/m<sup>2</sup> or greater and weight ≤400 lbs.</li> <li>• Willingness to accept randomization to each of the three arms</li> <li>• Willingness to change diet, physical activity, and weight</li> <li>• Regular access to computer with a reliable Internet connection</li> <li>• Ability to send and receive emails</li> <li>• Ability to complete online forms</li> <li>• Access to phone</li> <li>• Willingness to provide written informed consent</li> </ul> | <ul style="list-style-type: none"> <li>• Women who are breastfeeding, pregnant, or planning pregnancy within the next year</li> <li>• Medication-treated diabetes</li> <li>• Fasting blood glucose ≥200 mg/dL, or fasting blood glucose ≥126 and &lt;200 mg/dL and HbA1C ≥7%</li> <li>• Current or prior regular use of metformin within the past 3 months</li> <li>• Uncontrolled concurrent medical condition likely to limit compliance with the study interventions</li> <li>• Received any chemotherapy (unless anti-hormonal therapy) and/or radiation three months or less prior to the proposed intervention date</li> <li>• Have a prior history of lactic acidosis by self-report</li> <li>• Prior or planned bariatric surgery</li> <li>• Have significant renal disease or dysfunction defined as eGFR&lt;45</li> <li>• Have significant hepatic dysfunction (AST/ALT ≥ 2 x ULN or reported liver disease)</li> <li>• Self-reported average consumption of &gt; 14 alcoholic drink per week</li> <li>• Currently enrolled or planned to enroll in weight loss program</li> <li>• Hemoglobin &lt;9 g/dl</li> <li>• Platelet count &lt;100</li> <li>• WBC &lt;2.5</li> <li>• Plans to relocate from the area within one years</li> <li>• Use of prescription weight loss medication(s) (e.g., lorcaserin, topiramate/phentermine, phentermine, liraglutide, and bupropion/naltrexone), including off label use of drugs for</li> </ul> |

|  |                                                                                                    |
|--|----------------------------------------------------------------------------------------------------|
|  | weight loss or over-the-counter weight loss medications such as Orlistat within the past 6 months. |
|--|----------------------------------------------------------------------------------------------------|
